# Supplementary material for: The Structural Correlates of Statistical Information Processing during Speech Perception
Source: PLOS journal article supplement (doi:10.1371/journal.pone.0149375), 2016-02-26

## S1. Text

**A. BirdR1.wav.** Bird-song sequence random structure

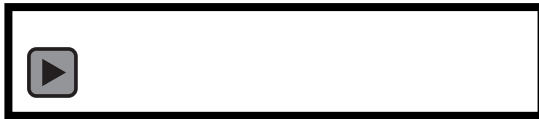

**B. BirdM1.wav.** Bird-song sequence mid-structure

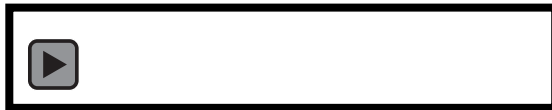

**C. BirdH1.wav.** Bird-song sequence high-structure

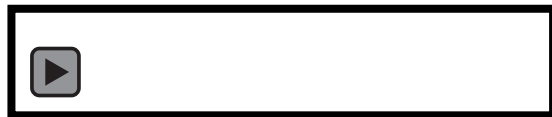

**D. SpeechR1.wav.** Syllable sequence random structure

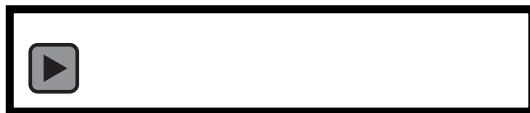

**E. SpeechM1.wav.** Syllable sequence mid-structure

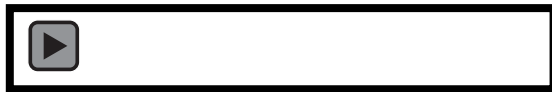

**F. SpeechH1.wav.** Syllable sequence high-structure

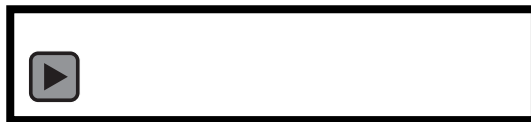

Supplement: S2 (10.1371/journal.pone.0149375.s002) [file journal.pone.0149375.s002]
